# Supplementary material for: Skp, Cullin, F-box (SCF)-Met30 and SCF-Cdc4-Mediated Proteolysis of CENP-A Prevents Mislocalization of CENP-A for Chromosomal Stability in Budding Yeast
Source: PLoS Genet. 2020 Feb 7;16(2):e1008597. doi: 10.1371/journal.pgen.1008597 (PMC7032732; doi:10.1371/journal.pgen.1008597)
Supplement: S1 Table — The results of the SGA screen with TS alleles of essential genes and deletion of selected non-essential genes when Cse4 is overexpressed. Listed are the TS allele identified, the mutant allele, SGA score, the standard deviation, and p-value scores filtered using the intermediate confidence threshold (p-value<0.05 and |Score|>0.08). Interactions that met the intermediate threshold of significance are indicated with a “1” while those that did not are indicated with a “0.” For the significant negative interactors, homology is denoted as C: Caenorhabditis elegans; D: Drosophila melanogaster; M: mouse; and H: Humans. Homolog and the human gene complementing the yeast mutant information is derived from https://yeastmine.yeastgenome.org/yeastmine/. (XLSX) [file pgen.1008597.s014.xlsx]

## Sheet: Sheet1
Name	Mutant	Score	Std. dev.	P-value	Significant	Homologues	Human Complementation
YDL017W_tsa131	cdc7-4	-1.348	0.047	5.761e-148	1	C, D, M, H	Y
YDR052C_tsa162	dbf4-2	-1.22	0.148	1.955e-53	1	D, M, H	Y
YDR052C_tsa95	dbf4-ts	-1.206	0.181	1.735e-54	1	D, M, H	Y
YMR281W_tsa1162	gpi12-ph	-1.13	0.056	9.193e-127	1	C, D, M, H	Y
YHR166C_tsa86	cdc23-1	-1.113	0.197	2.854e-16	1	C, D, M, H
YBR109C_tsa154	cmd1-1	-1.031	0.09	3.339e-39	1	C, D, M, H	Y
YDR052C_tsa161	dbf4-1	-0.989	0.128	1.185e-22	1	D, M, H	Y
YIR011C_tsa1105	sts1-ph	-0.975	0.148	2.449e-27	1	D
YOL123W_tsa960	hrp1-1	-0.94	0	0	1	C, D, M, H
YGL044C_tsa652	rna15-58	-0.937	0.183	3.198e-28	1	C, D, M, H
YDL017W_tsa880	cdc7-1	-0.927	0.168	1.259e-24	1	C, D, M, H	Y
YPR103W_tsa918	pre2-75	-0.916	0.162	2.372e-18	1	C, D, M, H
YFR052W_tsa405	rpn12-1	-0.906	0.093	8.627e-52	1	C, D, M, H
YNL006W_tsa467	lst8-15	-0.906	0.163	1.264e-14	1	C, D, M, H	Y
YOL102C_tsa1264	yol102c-ph	-0.858	0.675	1.365e-08	1	D, M, H
YLR200W_dma3275	yke2	-0.853	0.076	6.889e-23	1	C, D, M, H
YPR103W_tsa917	pre2-2	-0.838	0.3	1.139e-11	1	C, D, M, H
YFR004W_tsa534	rpn11-14	-0.819	0.09	6.026e-22	1	C, D, M, H	Y
YFL045C_tsa48	sec53-6	-0.81	0.418	3.527e-08	1	C, D, M, H
YJR065C_tsa894	arp3-31	-0.791	0.35	0.002514	1	C, D, M, H
YFL009W_tsa878	cdc4-1	-0.778	0.345	6.912e-09	1	C, D, M, H	Y
YBL034C_tsa643	stu1-6	-0.774	0.264	1.347e-08	1	C, D, M, H
YPR108W_tsa1037	rpn7-3	-0.772	0.101	1.761e-16	1	C, D, M, H	Y
YDL207W_tsa919	gle1-2	-0.759	0.727	0.04375	1	D, M, H
YDR356W_tsa301	spc110-220	-0.741	0.086	1.844e-21	1	D
YAR019C_tsa882	cdc15-2	-0.739	0.327	3.144e-07	1	C, D, M, H
YFR004W_tsa521	rpn11-8	-0.73	0.02	2.104e-150	1	C, D, M, H	Y
YDL147W_tsa1080	rpn5-ph	-0.73	0.071	3.163e-38	1	C, D, M, H	Y
YBR004C_tsa1243	ybr004c-ph	-0.717	0.518	2.305e-05	1	C, D, M, H	Y
YOL001W_dma4274	pho80	-0.703	0.282	7.488e-10	1	C, D, M, H
YBL034C_tsa454	stu1-8	-0.697	0.06	8.336e-22	1	C, D, M, H
YDL097C_tsa1146	rpn6-ph	-0.694	0.308	1.217e-06	1	C, D, M, H	Y
YDR052C_tsa164	dbf4-4	-0.68	0.125	4.336e-11	1	D, M, H	Y
YDR463W_dma1199	stp1	-0.657	0.185	1.641e-07	1
YHR200W_dma2222	rpn10	-0.638	0.092	3.072e-13	1	C, D, M, H
YKL213C_dma2910	doa1	-0.579	0.489	2.098e-06	1	C, D, M, H
YPL101W_dma4843	elp4	-0.573	0.253	2.451e-05	1	C, D, M, H	Y
YJR093C_tsa1096	fip1-ph	-0.571	0.253	9.443e-07	1	C, D, M, H
YLR056W_dma3153	erg3	-0.566	0.115	3.619e-06	1	M, H	Y
YDL008W_tsa783	apc11-13	-0.566	0.041	4.659e-27	1	C, D, M, H
YLR086W_tsa264	smc4-1	-0.56	0.104	1.104e-08	1	C, D, M, H
YDR180W_tsa66	scc2-4	-0.558	0.61	3.805e-07	1	C, D, M, H
YPL055C_dma4805	lge1	-0.554	0.315	7.935e-05	1
YDL126C_tsa208	cdc48-3	-0.54	0.083	3.954e-10	1	C, D, M, H	Y
YIR008C_tsa340	pri1-m4	-0.539	0.429	0.0001746	1	C, D, M, H
YNL102W_tsa897	pol1-12	-0.538	0.279	0.000262	1	C, D, M, H
YMR198W_dma3800	cik1	-0.527	0.079	1.385e-09	1
YDL165W_tsa314	cdc36-16	-0.526	0.035	4.962e-30	1	C, D, M, H
YDL020C_dma613	rpn4	-0.518	0.211	0.0003877	1
YMR263W_dma3870	sap30	-0.513	0.128	3.382e-06	1	D, M, H
YIL046W_tsa948	met30-6	-0.511	0.277	0.0009024	1	C, D, M, H
YBR011C_tsa1062	ipp1-ph	-0.508	0.023	1.451e-58	1	C, D, M, H
YDL029W_tsa886	arp2-14	-0.502	0.367	0.0003636	1	C, D, M, H
YJL115W_dma2518	asf1	-0.494	0.155	1.471e-07	1	C, D, M, H	Y
YLR197W_tsa1140	nop56-ph	-0.492	0.451	0.009067	1	C, D, M, H
YBR026C_dma196	etr1	-0.49	0.226	0.0001574	1	C, D, M, H	Y
YFR037C_tsa998	rsc8-ts16	-0.485	0.322	0.003151	1	C, D, M, H
YOR196C_dma4586	lip5	-0.484	0.249	0.0008647	1	C, D, M, H
YPL211W_tsa114	nip7-1	-0.482	0.105	7.506e-07	1	C, D, M, H	Y
YFL008W_tsa321	smc1-2	-0.478	0.015	3.398e-113	1	C, D, M, H
YDR311W_tsa715	tfb1-6	-0.477	0.065	5.086e-11	1	C, D, M, H
YFR028C_tsa926	cdc14-8	-0.467	0.134	9.135e-05	1	C, D, M, H	Y
YNL118C_tsa754	dcp2-7d	-0.464	0.193	0.0003622	1	C, D, M, H	Y
YHR007C_tsa14	erg11-td	-0.458	0.239	0.0005446	1	C, M, H	Y
YGR094W_tsa1241	ygr094w-ph	-0.456	0.536	0.000584	1	C, D, M, H	Y
YFL034C-B_tsa611	mob2-34	-0.454	0.705	0.001028	1
YGL097W_tsa955	srm1-ts	-0.452	0.67	0.001356	1	C, D, M, H	Y
YPR085C_tsa1232	ypr085c-ph	-0.449	0.119	1.193e-05	1	M, H
YNL006W_tsa466	lst8-6	-0.446	0.139	0.0008847	1	C, D, M, H	Y
YPR103W_tsa921	pre2-v214a	-0.444	0.31	0.001145	1	C, D, M, H
YBR082C_dma245	ubc4	-0.439	0.255	0.002555	1	C, D, M, H
YOL123W_tsa858	hrp1-4	-0.438	0.039	1.856e-20	1	C, D, M, H
YDR168W_tsa315	cdc37-ts	-0.433	0.08	8.056e-06	1	C, D, M, H
YLR215C_tsa946	cdc123-4	-0.424	0.081	2.82e-06	1	M, H	Y
YGL113W_tsa1119	sld3-ph	-0.417	0.094	5.588e-06	1
YHR036W_tsa1038	brl1-2221	-0.411	0.158	0.0001812	1
YPL007C_tsa1201	tfc8-ph	-0.404	0.219	0.004261	1
YGL011C_tsa1084	scl1-ph	-0.397	0.48	0.003373	1	C, D, M, H	Y
YLR208W_tsa52	sec13-1	-0.395	0.119	9.483e-05	1	C, D, M, H	Y
YDR162C_dma958	nbp2	-0.395	0.024	4.02e-34	1
YBR198C_tsa513	taf5-20	-0.388	0.171	0.00724	1	C, D, M, H
YHR065C_tsa1261	yhr065c-ph	-0.386	0.676	0.01421	1	C, D, M, H
YPL174C_dma4918	nip100	-0.384	0.334	0.002344	1	C, D, M, H
YNL064C_dma3979	ydj1	-0.382	0.185	0.004771	1	C, D, M, H	Y
YIL084C_dma2337	sds3	-0.38	0.347	0.01037	1	D, M, H
YLR268W_tsa121	sec22-3	-0.378	0.193	0.04867	1	C, D, M, H
YBR135W_tsa332	cks1-38	-0.378	0.055	2.698e-07	1	C, D, M, H	Y
YHR067W_dma2135	htd2	-0.375	0.255	0.01028	1		Y
YDL097C_tsa1035	rpn6-1	-0.375	0.116	0.001145	1	C, D, M, H	Y
YOR236W_tsa884	dfr1-td	-0.372	0.112	0.0001597	1	C, D, M, H	Y
YFR050C_tsa1139	pre4-ph	-0.367	0.096	7.029e-05	1	C, D, M, H
YDL028C_tsa169	mps1-417	-0.36	0.202	0.006872	1	C, D, M, H
YMR298W_tsa1059	lip1-ph	-0.36	0.377	0.04811	1
YDL103C_tsa1093	qri1-ph	-0.351	0.32	0.0468	1	C, D, M, H	Y
YDL033C_dma630	slm3	-0.351	0.228	0.006178	1	C, D, M, H	Y
YER133W_tsa185	glc7-12	-0.351	0.082	0.0001554	1	C, D, M, H	Y
YDR228C_tsa679	pcf11-ts10	-0.35	0.196	0.002646	1	C, D, M, H
YIL040W_dma2275	apq12	-0.349	0.413	0.01908	1
YHR024C_tsa526	mas2-10	-0.342	0.128	0.002556	1	C, D, M, H
YPR103W_tsa916	pre2-127	-0.342	0.328	0.02364	1	C, D, M, H
YML065W_tsa1170	orc1-ph	-0.34	0.087	0.0005494	1	C, D, M, H
YBL040C_tsa1072	erd2-ph	-0.338	0.319	0.02083	1	C, D, M, H
YLR117C_tsa1047	clf1-1	-0.332	0.101	0.0007387	1	C, D, M, H
YML041C_dma3546	vps71	-0.325	0.126	0.001723	1	C, D, M, H
YGR119C_tsa954	nup57-e17	-0.323	0.396	0.04424	1	C, D, M, H
YML081C-A_dma3578	atp18	-0.319	0.194	0.01115	1
YGL092W_tsa977	nup145-r4	-0.317	0.09	0.001233	1	C, D, M, H
YNR003C_tsa640	rpc34-1	-0.308	0.095	0.001735	1	C, D, M, H	Y
YER083C_dma1389	get2	-0.303	0.354	0.03598	1		Y
YMR224C_dma3806	mre11	-0.303	0.053	2.359e-06	1	C, D, M, H
YBR087W_tsa887	rfc5-1	-0.3	0.126	0.0155	1	C, D, M, H
YOR116C_tsa831	rpo31-698	-0.296	0.083	0.0002089	1	C, D, M, H
YNL061W_tsa626	nop2-5	-0.294	0.229	0.02556	1	C, D, M, H	Y
YDR196C_tsa890	cab5-1	-0.291	0.345	0.02424	1	C, D, M, H	Y
YHR178W_dma2213	stb5	-0.29	0.11	0.003593	1
YDL132W_tsa974	cdc53-1	-0.289	0.165	0.0269	1	C, D, M, H	Y
YDR392W_dma1125	spt3	-0.289	0.062	9.227e-05	1	D, M, H
YMR076C_tsa983	pds5-1	-0.287	0.135	0.008162	1	C, D, M, H
YHR111W_dma2155	uba4	-0.286	0.088	0.0006839	1	C, D, M, H	Y
YDL065C_dma655	pex19	-0.284	0.042	3.32e-07	1	C, D, M, H
YER168C_tsa1114	cca1-ph	-0.283	0.441	0.03663	1	C, D, M, H	Y
YPL082C_tsa363	mot1-1033	-0.282	0.163	0.01045	1	C, D, M, H
YBL034C_tsa822	stu1-12	-0.28	0.328	0.01572	1	C, D, M, H
YLL002W_dma3033	rtt109	-0.278	0.185	0.01081	1
YLR008C_tsa501	pam18-1	-0.276	0.398	0.03922	1	C, D, M, H
YGR270W_dma2009	yta7	-0.274	0.273	0.02067	1	C, M, H
YGR229C_dma1990	smi1	-0.272	0.357	0.01695	1
YDL103C_tsa860	qri1-ts6	-0.264	0.29	0.02686	1	C, D, M, H	Y
YBR079C_tsa990	rpg1-1	-0.263	0.379	0.03375	1	C, D, M, H
YGR006W_tsa430	prp18-1202	-0.262	0.21	0.04319	1	C, D, M, H
YLR436C_dma3485	ecm30	-0.259	0.238	0.02324	1	C, D, M, H
YIL008W_dma2255	urm1	-0.259	0.074	0.002045	1	C, D, M, H	Y
YPR191W_dma5152	qcr2	-0.258	0.207	0.03127	1	C, M, H
YPR016C_tsa1008	tif6-ts1	-0.257	0.213	0.03755	1	C, D, M, H	Y
YDL102W_tsa17	cdc2-7	-0.252	0.404	0.04182	1
YLR384C_dma3413	iki3	-0.248	0.159	0.04623	1	C, D, M, H
YDL028C_tsa167	mps1-3796	-0.245	0.319	0.04404	1	C, D, M, H
YNL041C_dma3970	cog6	-0.244	0.344	0.03387	1	C, D, M, H
YOR326W_tsa269	myo2-14	-0.244	0.305	0.04391	1	C, D, M, H
YFL008W_tsa68	smc1-259	-0.239	0.126	0.03175	1	C, D, M, H
YGR211W_tsa547	zpr1-1	-0.238	0.093	0.01279	1	C, D, M, H	Y
YOR275C_dma4677	rim20	-0.229	0.186	0.03884	1	C, D, M, H
YHR036W_tsa1039	brl1-3231	-0.228	0.15	0.03889	1
YGR002C_tsa895	swc4-4	-0.22	0.054	0.001545	1	C, D, M, H
YHR083W_tsa493	sam35-2	-0.215	0.118	0.03847	1
YBR055C_tsa455	prp6-1	-0.213	0.119	0.02856	1	C, D, M, H
YDR127W_dma916	aro1	-0.209	0.137	0.03658	1
YJL125C_tsa620	gcd14-4	-0.208	0.105	0.04259	1	C, D, M, H	Y
YNL062C_tsa442	gcd10-506	-0.194	0.036	2.296e-05	1	C, D, M, H	Y
YOR204W_tsa932	ded1-f144c	-0.194	0.031	3.624e-09	1	C, D, M, H	Y
YLR195C_tsa690	nmt1-181	-0.193	0.021	3.233e-11	1	C, D, M, H	Y
YDR188W_tsa1016	cct6-18	-0.193	0.045	0.0009468	1	C, D, M, H
YOL018C_dma4304	tlg2	-0.192	0.103	0.0355	1	C, D, M, H
YGL073W_tsa423	hsf1-848	-0.188	0.098	0.037	1	C, D, M, H	Y
YBR057C_dma218	mum2	-0.168	0.075	0.0323	1
YHR027C_tsa255	rpn1-821	-0.148	0.04	0.004251	1	C, D, M, H	Y
YBR080C_tsa54	sec18-1	-0.144	0.024	9.741e-06	1	C, D, M, H
YDL147W_tsa1036	rpn5-1	-0.137	0.035	0.002087	1	C, D, M, H	Y
YDR145W_tsa806	taf12-l446a	-0.136	0.048	0.01589	1	C, D, M, H
YBL084C_tsa89	cdc27-1	-0.108	0.007	9.742e-25	1	C, D, M, H
YJL011C_tsa1270	yjl011c-ph	0.087	0.032	0.02715	1
YHR189W_dma2229	pth1	0.103	0.032	0.01223	1
YJR141W_tsa1248	yjr141w-ph	0.128	0.057	0.04166	1
YAL041W_tsa304	cdc24-5	0.13	0.048	0.02675	1
YNR017W_tsa1168	tim23-ph	0.136	0.03	0.0008116	1
YGL047W_tsa1197	alg13-ph	0.147	0.054	0.01938	1
YFL039C_tsa910	act1-159	0.147	0.046	0.01083	1
YML023C_tsa1005	nse5-ts2	0.15	0.069	0.04337	1
YGL091C_tsa1120	nbp35-ph	0.152	0.029	7.234e-05	1
YFL039C_tsa216	act1-132	0.163	0.079	0.0442	1
YMR168C_tsa294	cep3-1	0.168	0.02	4.668e-09	1
YBR202W_tsa125	cdc47-ts	0.173	0.008	1.159e-51	1
YGR081C_dma1857	slx9	0.174	0.06	0.01033	1
YGR092W_tsa158	dbf2-1	0.174	0.053	0.00582	1
YDR527W_tsa1216	rba50-ph	0.175	0.062	0.01076	1
YPL028W_tsa531	erg10-1	0.176	0.036	0.0002015	1
YML102W_dma3590	cac2	0.182	0.111	0.04844	1
YDR088C_tsa657	slu7-ts2	0.188	0.044	0.00112	1
YOR361C_tsa27	prt1-1	0.19	0.111	0.04962	1
YLR452C_dma3495	sst2	0.192	0.059	0.0105	1
YAL041W_tsa412	cdc24-3	0.194	0.057	0.004582	1
YPL047W_dma4811	sgf11	0.204	0.063	0.004937	1
YNL136W_dma4040	eaf7	0.21	0.035	8.822e-06	1
YOR151C_tsa693	rpb2-6	0.214	0.096	0.02761	1
YPL169C_tsa816	mex67-ts5	0.217	0.122	0.03028	1
YDL105W_tsa1226	nse4-ph	0.22	0.047	0.0002482	1
YGR113W_tsa240	dam1-11	0.237	0.017	7.087e-24	1
YIL083C_tsa1212	yil083c-ph	0.239	0.12	0.02138	1
YOL135C_tsa739	med7-163	0.239	0.125	0.02352	1
YLL038C_dma3057	ent4	0.248	0.15	0.02691	1
YPL076W_tsa463	gpi2-774	0.248	0.057	0.0007032	1
YBL026W_tsa1065	lsm2-ph	0.249	0.044	1.223e-05	1
YMR296C_tsa602	lcb1-4	0.252	0.119	0.02314	1
YGL093W_tsa446	spc105-15	0.252	0.202	0.03833	1
YMR296C_tsa606	lcb1-10	0.259	0.07	0.002248	1
YLR459W_tsa201	gab1-2	0.261	0.076	0.002594	1
YML001W_dma3511	ypt7	0.266	0.176	0.0385	1
YJR112W_tsa438	nnf1-17	0.266	0.556	0.04684	1
YBL105C_tsa538	pkc1-2	0.266	0.044	3.222e-06	1
YHR058C_tsa1053	med6-ts	0.273	0.154	0.03568	1
YOR174W_tsa738	med4-6	0.278	0.036	7.757e-09	1
YOR089C_dma4520	vps21	0.279	0.251	0.03034	1
YLR007W_tsa1044	nse1-16	0.28	0.114	0.01136	1
YDL102W_tsa406	cdc2-1	0.281	0.193	0.02412	1
YDR238C_tsa721	sec26-f856aw860a	0.281	0.133	0.01509	1
YER093C_tsa659	tsc11-7	0.283	0.356	0.04547	1
YFL039C_tsa911	act1-121	0.285	0.085	0.002129	1
YFL039C_tsa214	act1-111	0.29	0.076	0.00083	1
YML023C_tsa1006	nse5-ts3	0.292	0.237	0.02984	1
YGL137W_tsa546	sec27-1	0.292	0.164	0.02259	1
YAL041W_tsa410	cdc24-2	0.293	0.318	0.03363	1
YJL091C_tsa655	gwt1-20	0.293	0.157	0.04632	1
YPL057C_dma4803	sur1	0.294	0.317	0.04108	1
YLL050C_tsa234	cof1-5	0.294	0.195	0.02189	1
YDR276C_dma1024	pmp3	0.295	0.028	2.103e-14	1
YPL128C_tsa1199	tbf1-ph	0.297	0.196	0.02891	1
YIL068C_tsa38	sec6-4	0.299	0.159	0.01208	1
YGL022W_tsa544	stt3-7	0.302	0.085	0.002156	1
YER125W_tsa465	rsp5-3	0.305	0.086	0.00111	1
YMR117C_tsa293	spc24-9	0.308	0.162	0.03579	1
YGR099W_tsa604	tel2-7	0.309	0.389	0.04077	1
YPL228W_tsa270	cet1-1	0.311	0.107	0.003683	1
YDL105W_tsa1013	nse4-ts2	0.313	0.161	0.02251	1
YDL217C_tsa714	tim22-19	0.32	0.077	0.0005455	1
YMR094W_tsa59	ctf13-30	0.327	0.108	0.002128	1
YMR197C_tsa634	vti1-2	0.33	0.373	0.03	1
YBR110W_tsa177	alg1-1	0.331	0.144	0.0224	1
YJR076C_tsa84	cdc11-5	0.332	0.079	0.0008115	1
YGR113W_tsa244	dam1-19	0.334	0.26	0.02261	1
YGR158C_tsa614	mtr3-ts	0.336	0.131	0.01346	1
YGL245W_tsa1194	gus1-ph	0.339	0.149	0.004546	1
YMR239C_tsa673	rnt1-ts	0.339	0.36	0.03126	1
YDR361C_tsa580	bcp1-ts	0.343	0.108	0.001458	1
YJR017C_tsa698	ess1-h164r	0.343	0.205	0.006428	1
YLR186W_tsa1141	emg1-ph	0.348	0.236	0.02283	1
YFL039C_tsa136	act1-101	0.351	0.345	0.01678	1
YDR238C_tsa722	sec26-11d26	0.353	0.259	0.01516	1
YGR113W_tsa242	dam1-5	0.355	0.122	0.00263	1
YIR010W_tsa436	dsn1-8	0.356	0.254	0.00938	1
YOR149C_tsa849	smp3-1	0.358	0.15	0.009826	1
YBR142W_tsa1109	mak5-ph	0.361	0.205	0.00907	1
YDR331W_tsa1230	ydr331w-ph	0.366	0.533	0.02482	1
YKL203C_tsa398	tor2-21	0.367	0.125	0.001608	1
YGL001C_tsa742	erg26-1	0.367	0.124	0.002048	1
YGR140W_tsa221	cbf2-2	0.371	0.542	0.01875	1
YHR188C_tsa1166	gpi16-ph	0.372	0.469	0.02967	1
YER125W_tsa464	rsp5-sm1	0.374	0.151	0.006148	1
YHR066W_dma2113	ssf1	0.377	0.16	0.009678	1
YIR006C_tsa353	pan1-4	0.378	0.499	0.04764	1
YNR038W_tsa1165	dbp6-ph	0.379	0.267	0.01863	1
YGL145W_tsa271	tip20-5	0.382	0.31	0.007714	1
YNL138W_tsa675	srv2-ts	0.382	0.046	8.946e-10	1
YGR091W_tsa400	prp31-ts	0.383	0.239	0.01097	1
YFL039C_tsa223	act1-129	0.384	0.092	0.0006087	1
YLR222C_tsa1250	ylr222c-ph	0.386	0.128	0.006401	1
YJR068W_tsa342	rfc2-1	0.387	0.194	0.0222	1
YML069W_tsa847	pob3-q308k	0.389	0.11	0.003594	1
YDR044W_tsa1076	hem13-ph	0.392	0.563	0.02769	1
YCR002C_tsa78	cdc10-1	0.392	0.266	0.008429	1
YJR045C_tsa328	ssc1-2	0.392	0.124	0.002829	1
YGR216C_tsa548	gpi1-1	0.393	0.405	0.0384	1
YHR058C_tsa1094	med6-ph	0.396	0.206	0.003611	1
YPR161C_tsa1251	ypr161c-ph	0.396	0.041	3.501e-13	1
YDR416W_tsa1236	ydr416w-ph	0.398	0.178	0.008746	1
YML015C_tsa645	taf11-ts2	0.4	0.093	0.0001578	1
YLR440C_tsa1214	sec39-ph	0.406	0.079	2.192e-05	1
YDR182W_tsa31	cdc1-1	0.41	0.205	0.01559	1
YBR193C_tsa751	med8-39	0.416	0.052	6.451e-10	1
YHR069C_tsa724	rrp4-1	0.417	0.28	0.03034	1
YLR066W_tsa623	spc3-4	0.419	0.276	0.007965	1
YDR083W_dma882	rrp8	0.429	0.32	0.004091	1
YDR240C_tsa1235	ydr240c-ph	0.431	0.355	0.04048	1
YLR298C_tsa844	yhc1-8	0.433	0.106	0.0001001	1
YLR276C_tsa1148	dbp9-ph	0.436	0.11	0.0001977	1
YER136W_tsa64	gdi1-1	0.436	0.139	0.00544	1
YDR168W_tsa317	cdc37-1	0.439	0.111	0.002361	1
YDR172W_tsa28	sup35-td	0.441	0.062	6.516e-08	1
YMR235C_tsa172	rna1-s116f	0.441	0.256	0.01412	1
YGR195W_tsa1126	ski6-ph	0.443	0.186	0.002034	1
YLR298C_tsa840	yhc1-3	0.444	0.585	0.04272	1
YOR336W_tsa139	kre5-ts2	0.448	0.184	0.002689	1
YLR342W_dma3377	fks1	0.448	0.095	1.187e-05	1
YLL050C_tsa248	cof1-8	0.449	0.155	0.004646	1
YJR112W_tsa440	nnf1-77	0.452	0.082	1.227e-06	1
YFL039C_tsa220	act1-155	0.454	0.035	1.316e-21	1
YHR101C_tsa1129	big1-ph	0.459	0.188	0.01192	1
YGL174W_dma1707	bud13	0.459	0.065	9.465e-09	1
YAR019C_tsa821	cdc15-1	0.463	0.298	0.001803	1
YFL039C_tsa215	act1-119	0.466	0.337	0.002437	1
YDR394W_tsa785	rpt3-1	0.469	0.111	3.976e-05	1
YLR314C_tsa885	cdc3-1	0.479	0.304	0.004235	1
YNL102W_tsa362	pol1-1	0.515	0.285	0.0007834	1
YDR062W_tsa585	lcb2-16	0.523	0.041	2.295e-20	1
YIR010W_tsa435	dsn1-7	0.527	0.296	0.007572	1
YPL233W_tsa450	nsl1-5	0.534	0.142	3.09e-05	1
YMR296C_tsa600	lcb1-5	0.541	0.181	0.0005086	1
YDR288W_tsa995	nse3-ts4	0.542	0.081	1.641e-08	1
YFL034C-B_tsa609	mob2-11	0.544	0.485	0.02015	1
YML049C_tsa982	rse1-1	0.548	0.087	4.633e-08	1
YOL066C_tsa1181	rib2-ph	0.564	0.165	0.0002108	1
YPL076W_tsa462	gpi2-1-7b	0.566	0.212	0.001112	1
YGL142C_tsa1133	gpi10-ph	0.569	0.313	0.002917	1
YBR193C_tsa741	med8-51	0.582	0.192	7.229e-05	1
YGL130W_tsa94	ceg1-3	0.598	0.076	1.183e-10	1
YDR331W_tsa371	gpi8-ts	0.608	0.063	3.97e-13	1
YOR122C_tsa232	pfy1-4	0.613	0.103	5.346e-07	1
YGL022W_tsa551	stt3-2	0.618	0.496	0.003537	1
YBR237W_tsa117	prp5-1	0.62	0.118	5.197e-06	1
YMR168C_tsa845	cep3-2	0.655	0.238	0.001887	1
YOR294W_tsa688	rrs1-84	0.672	0.072	3.483e-14	1
YFL039C_tsa137	act1-3	0.676	0.305	0.003547	1
YNL102W_tsa345	pol1-17	0.885	0	0	1
YIL118W_tsa836	rho3-ser228	-0.327	0.573	0.1651	0
YPR034W_tsa930	arp7-e411k	-0.307	0.422	0.05505	0
YJL148W_dma2540	rpa34	-0.305	0.435	0.0595	0
YGR092W_tsa159	dbf2-2	-0.297	0.287	0.05311	0
YLR071C_tsa908	rgr1-100	-0.288	0.176	0.06051	0
YOR260W_tsa850	gcd1-502	-0.288	0.368	0.05227	0
YDR489W_tsa1058	sld5-ph	-0.286	0.271	0.05623	0
YBL034C_tsa274	stu1-5	-0.278	0.532	0.09704	0
YBR118W_dma5254	tef2	-0.277	0.234	0.07762	0
YOR362C_tsa1249	yor362c-ph	-0.276	0.377	0.05224	0
YDR310C_dma1063	sum1	-0.271	0.472	0.05139	0
YDR054C_tsa92	cdc34-1	-0.27	0.498	0.1911	0
YDL007W_tsa934	rpt2-rf	-0.269	0.295	0.08559	0
YOR244W_tsa560	esa1-l254p	-0.262	0.433	0.05296	0
YPR055W_tsa364	sec8-6	-0.262	0.329	0.1483	0
YJL005W_tsa354	cdc35-1	-0.262	0.421	0.08782	0
YGR074W_tsa748	smd1-1	-0.258	0.318	0.1884	0
YOR157C_tsa268	pup1-1	-0.253	0.253	0.07155	0
YLR032W_dma3127	rad5	-0.25	0.225	0.08629	0
YGR098C_tsa978	esp1-1	-0.25	0.29	0.1101	0
YER147C_tsa986	scc4-4	-0.239	0.224	0.07965	0
YNL132W_tsa1262	ynl132w-ph	-0.238	0.392	0.05355	0
YDR170C_tsa44	sec7-1	-0.238	0.252	0.07325	0
YOR244W_tsa563	esa1-d414	-0.237	0.359	0.06596	0
YLR459W_tsa200	gab1-1	-0.235	0.137	0.06021	0
YJL001W_tsa292	pre3-2	-0.234	0.486	0.05786	0
YNL138W_tsa800	srv2-2	-0.229	0.191	0.09373	0
YER161C_dma1464	spt2	-0.229	0.171	0.05304	0
YGL213C_dma1731	ski8	-0.229	0.372	0.1429	0
YDR404C_tsa1268	ydr404c-ph	-0.228	0.257	0.09985	0
YOL034W_tsa727	smc5-6	-0.223	0.281	0.05424	0
YBR029C_tsa1063	cds1-ph	-0.218	0.29	0.06927	0
YHR088W_tsa1095	rpf1-ph	-0.215	0.264	0.06466	0
YPL094C_tsa224	sec62-ts	-0.213	0.183	0.06422	0
YAL041W_tsa42	cdc24-h	-0.212	0.308	0.1487	0
YER094C_tsa1138	pup3-ph	-0.207	0.172	0.08566	0
YOR259C_tsa263	rpt4-145	-0.205	0.219	0.08159	0
YNL067W_dma3975	rpl9b	-0.202	0.304	0.0927	0
YJL081C_tsa618	arp4-g161d	-0.201	0.213	0.07739	0
YLR100W_tsa1172	erg27-ph	-0.201	0.402	0.1202	0
YGL112C_tsa608	taf6-ts	-0.2	0.325	0.1156	0
YGR005C_tsa1137	tfg2-ph	-0.199	0.307	0.1168	0
YGL048C_tsa186	rpt6-25	-0.197	0.126	0.06796	0
YDL220C_tsa881	cdc13-1	-0.196	0.203	0.09839	0
YIL062C_tsa888	arc15-10	-0.196	0.741	0.1192	0
YJR139C_dma2730	hom6	-0.196	0.482	0.09904	0
YFL009W_tsa415	cdc4-2	-0.195	0.307	0.2669	0
YBL007C_dma91	sla1	-0.195	0.374	0.1546	0
YPL209C_tsa206	ipl1-2	-0.193	0.324	0.1066	0
YDR052C_tsa163	dbf4-3	-0.193	0.436	0.1824	0
YDR123C_dma920	ino2	-0.191	0.137	0.08839	0
YML105C_tsa710	sec65-1	-0.187	0.183	0.1089	0
YBR055C_tsa367	prp6-ts	-0.187	0.203	0.09489	0
YMR005W_tsa942	taf4-18	-0.186	0.578	0.1747	0
YPL020C_tsa566	ulp1-333	-0.185	0.51	0.2115	0
YMR049C_tsa1102	erb1-ph	-0.184	0.149	0.05317	0
YPR060C_dma5054	aro7	-0.183	0.23	0.1275	0
YDR292C_tsa733	srp101-47	-0.182	0.347	0.205	0
YPR178W_tsa500	prp4-1	-0.181	0.3	0.1055	0
YBL034C_tsa950	stu1-7	-0.18	0.152	0.1117	0
YMR239C_tsa674	rnt1-47	-0.178	0.434	0.1272	0
YFL009W_tsa334	cdc4-3	-0.177	0.146	0.06421	0
YDL126C_tsa209	cdc48-2	-0.176	0.215	0.1073	0
YOR181W_tsa912	las17-1	-0.175	0.339	0.2361	0
YNL153C_dma4055	gim3	-0.175	0.284	0.1969	0
YMR093W_tsa1246	ymr093w-ph	-0.172	0.174	0.08855	0
YDR510W_tsa928	smt3-331	-0.172	0.41	0.182	0
YBR123C_tsa568	tfc1-e447k	-0.172	0.221	0.1665	0
YJL035C_tsa1099	tad2-ph	-0.171	0.177	0.09436	0
YLR005W_tsa752	ssl1-t242i	-0.17	0.2	0.1342	0
YMR112C_tsa799	med11-ts	-0.168	0.295	0.127	0
YHR191C_tsa322	ctf8-162	-0.167	0.265	0.1031	0
YML098W_tsa797	taf13-1	-0.167	0.147	0.1263	0
YDR045C_tsa1078	rpc11-ph	-0.166	0.403	0.162	0
YBR198C_tsa512	taf5-15	-0.165	0.344	0.13	0
YHR196W_tsa1135	utp9-ph	-0.165	0.231	0.1072	0
YGL093W_tsa824	spc105-4	-0.165	0.086	0.06084	0
YJL050W_tsa431	mtr4-1	-0.163	0.35	0.1167	0
YDR145W_tsa518	taf12-ts23	-0.163	0.341	0.1901	0
YMR290C_tsa1161	has1-ph	-0.161	0.4	0.2223	0
YGR179C_tsa227	okp1-5	-0.159	0.198	0.1398	0
YNL102W_tsa344	pol1-2	-0.158	0.349	0.1813	0
YCL016C_dma473	dcc1	-0.157	0.116	0.1142	0
YGL048C_tsa907	rpt6-20	-0.156	0.165	0.1273	0
YDR496C_dma1201	puf6	-0.156	0.093	0.06088	0
YER157W_tsa41	cog3-1	-0.155	0.263	0.1578	0
YJL046W_dma2464	aim22	-0.152	0.097	0.06405	0
YHR191C_tsa323	ctf8-9	-0.152	0.301	0.2041	0
YDR512C_dma1213	emi1	-0.151	0.111	0.1125	0
YOL038W_tsa1153	pre6-ph	-0.151	0.443	0.1751	0
YDR334W_dma1071	swr1	-0.151	0.26	0.2296	0
YHR164C_tsa352	dna2-1	-0.149	0.184	0.1027	0
YPL010W_tsa689	ret3-1	-0.147	0.398	0.2101	0
YDL002C_dma621	nhp10	-0.144	0.168	0.1892	0
YMR190C_dma3784	sgs1	-0.143	0.181	0.1187	0
YDL143W_tsa729	cct4-1	-0.143	0.097	0.1308	0
YGL120C_tsa607	prp43-ts2	-0.14	0.162	0.1541	0
YLR393W_dma3426	atp10	-0.14	0.372	0.2191	0
YDR145W_tsa514	taf12-9	-0.139	0.415	0.1986	0
YPR025C_tsa77	ccl1-ts4	-0.138	0.125	0.1125	0
YKL208W_dma2913	cbt1	-0.137	0.614	0.202	0
YML098W_tsa636	taf13-2	-0.137	0.321	0.2278	0
YGL207W_tsa339	spt16-ts	-0.135	0.591	0.2144	0
YBL084C_tsa90	cdc27-2	-0.135	0.11	0.1157	0
YPR161C_tsa1029	sgv1-35	-0.134	0.45	0.255	0
YLR005W_tsa1132	ssl1-ph	-0.133	0.364	0.1846	0
YJL039C_tsa496	nup192-15	-0.131	0.245	0.1867	0
YLR291C_tsa1149	gcd7-ph	-0.131	0.449	0.1953	0
YOR259C_tsa260	rpt4-150	-0.131	0.323	0.2658	0
YJR072C_tsa1224	npa3-ph	-0.129	0.305	0.2286	0
YLR186W_tsa1056	emg1-1	-0.129	0.494	0.2608	0
YGR092W_dma1850	dbf2	-0.128	0.431	0.2946	0
YGL116W_tsa417	cdc20-2	-0.127	0.203	0.1805	0
YML125C_tsa1210	pga3-ph	-0.126	0.265	0.2547	0
YDR212W_tsa448	tcp1-2	-0.124	0.216	0.2082	0
YAL025C_tsa1066	mak16-ph	-0.123	0.225	0.1979	0
YIL147C_tsa1001	sln1-ts4	-0.123	0.278	0.2807	0
YFL017C_tsa1048	gna1-ts	-0.122	0.622	0.3803	0
YJL025W_tsa1130	rrn7-ph	-0.118	0.075	0.1104	0
YPR086W_tsa832	sua7-c149r	-0.117	0.075	0.09512	0
YDL103C_tsa859	qri1-ts1	-0.115	0.374	0.2033	0
YFL038C_tsa591	ypt1-3	-0.115	0.208	0.2374	0
YDL208W_tsa1176	nhp2-ph	-0.113	0.225	0.2098	0
YDR460W_tsa951	tfb3-ts	-0.112	0.165	0.281	0
YLR347C_tsa228	kap95-e126k	-0.111	0.302	0.2485	0
YDR049W_dma844	vms1	-0.111	0.241	0.2692	0
YJL085W_tsa856	exo70-29/37	-0.111	0.285	0.3212	0
YDL030W_tsa597	prp9-1	-0.108	0.492	0.3168	0
YGR120C_tsa187	cog2-1	-0.108	0.297	0.2962	0
YMR240C_tsa639	cus1-3	-0.108	0.519	0.3472	0
YDR437W_tsa1179	gpi19-ph	-0.107	0.288	0.268	0
YDR398W_tsa1242	ydr398w-ph	-0.107	0.057	0.08278	0
YBL097W_tsa510	brn1-9	-0.106	0.057	0.07032	0
YLR314C_tsa130	cdc3-3	-0.105	0.051	0.06585	0
YBR221C_dma364	pdb1	-0.105	0.148	0.2033	0
YBR121C_tsa1071	grs1-ph	-0.104	0.262	0.2919	0
YPR135W_dma5136	ctf4	-0.101	0.379	0.2927	0
YGR099W_tsa938	tel2-15	-0.099	0.415	0.2705	0
YLR166C_tsa63	sec10-2	-0.099	0.182	0.3188	0
YBR253W_tsa1068	srb6-ph	-0.098	0.453	0.3289	0
YLL035W_tsa1167	grc3-ph	-0.096	0.273	0.2452	0
YML077W_tsa1131	bet5-ph	-0.096	0.118	0.2374	0
YDR087C_tsa181	rrp1-1	-0.095	0.14	0.2598	0
YOR149C_tsa204	smp3-2	-0.093	0.165	0.2408	0
YDR498C_tsa55	sec20-1	-0.092	0.163	0.2186	0
YPR016C_tsa1010	tif6-ts4	-0.09	0.382	0.2873	0
YLR002C_tsa1164	noc3-ph	-0.09	0.523	0.323	0
YMR061W_tsa1106	rna14-ph	-0.089	0.089	0.1761	0
YPL160W_tsa922	cdc60-ts	-0.088	0.556	0.2868	0
YDR362C_tsa784	tfc6-m1	-0.088	0.362	0.2769	0
YCL010C_dma478	sgf29	-0.087	0.066	0.1434	0
YNL102W_tsa346	pol1-13	-0.087	0.391	0.3225	0
YOR341W_tsa532	rpa190-g728d	-0.086	0.262	0.3014	0
YBR195C_dma340	msi1	-0.086	0.134	0.2748	0
YNL002C_tsa1159	rlp7-ph	-0.085	0.265	0.2833	0
YHR186C_tsa291	kog1-1	-0.085	0.223	0.2646	0
YLL036C_tsa247	prp19-1	-0.083	0.403	0.3564	0
YDR437W_tsa1014	gpi19-2	-0.081	0.229	0.3426	0
YOR250C_tsa1186	clp1-ph	-0.081	0.183	0.3028	0
YLR430W_tsa1023	sen1-1	-0.08	0.368	0.3484	0
YMR304W_dma3909	ubp15	-0.079	0.209	0.3417	0
YDL084W_tsa976	sub2-1	-0.078	0.056	0.152	0
YHR030C_dma2112	slt2	-0.077	0.441	0.3762	0
YFR028C_tsa146	cdc14-3	-0.076	0.235	0.3685	0
YMR078C_dma3676	ctf18	-0.074	0.398	0.3125	0
YGL098W_tsa592	use1-ts	-0.074	0.3	0.3266	0
YHR020W_tsa1221	yhr020w-ph	-0.074	0.166	0.3236	0
YNL091W_dma4002	nst1	-0.073	0.646	0.349	0
YOR249C_tsa746	apc5-ca	-0.073	0.314	0.3717	0
YOL135C_tsa740	med7-141	-0.073	0.327	0.3624	0
YOR335C_tsa905	ala1-1	-0.073	0.225	0.3458	0
YLR045C_tsa555	stu2-13	-0.072	0.215	0.3201	0
YJL168C_dma2546	set2	-0.072	0.276	0.3331	0
YHR085W_tsa1217	ipi1-ph	-0.072	0.134	0.2818	0
YFL034C-B_tsa935	mob2-14	-0.072	1.08	0.3588	0
YOR249C_tsa745	apc5-ca-paps	-0.072	0.292	0.3204	0
YPR161C_tsa1028	sgv1-80	-0.071	0.681	0.358	0
YGR185C_tsa290	tys1-1	-0.071	0.334	0.331	0
YLR268W_tsa313	sec22-1	-0.07	0.097	0.2742	0
YBR265W_tsa543	tsc10-1	-0.068	0.282	0.3262	0
YHR019C_tsa1117	ded81-ph	-0.068	0.066	0.2039	0
YOL077C_tsa1171	brx1-ph	-0.068	0.154	0.2884	0
YDR478W_tsa1184	snm1-ph	-0.067	0.146	0.3379	0
YPR070W_dma5068	med1	-0.064	0.147	0.3132	0
YDR228C_tsa685	pcf11-2	-0.064	0.151	0.3019	0
YLR103C_tsa694	cdc45-27	-0.064	0.246	0.3594	0
YDL105W_tsa991	nse4-ts1	-0.062	0.037	0.1214	0
YPL209C_tsa165	ipl1-1	-0.061	0.129	0.3046	0
YLR078C_tsa199	bos1-1	-0.061	0.238	0.3597	0
YPR190C_tsa1238	ypr190c-ph	-0.061	0.382	0.3961	0
YMR154C_dma3750	rim13	-0.06	0.456	0.3738	0
YHR034C_dma2108	pih1	-0.059	0.31	0.3539	0
YLR087C_dma3192	csf1	-0.059	0.173	0.3395	0
YML069W_tsa846	pob3-l78r	-0.058	0.073	0.2674	0
YFL017C_tsa1244	yfl017c-ph	-0.057	0.585	0.3976	0
YAL041W_tsa148	cdc24-11	-0.054	0.268	0.4043	0
YOR020C_tsa681	hsp10-ts	-0.051	0.222	0.3792	0
YGR172C_tsa980	yip1-4	-0.051	0.178	0.3557	0
YHR190W_tsa1128	erg9-ph	-0.051	0.285	0.3991	0
YFR027W_tsa272	eco1-1	-0.05	0.354	0.4095	0
YNL061W_tsa628	nop2-6	-0.049	0.565	0.3997	0
YGL130W_tsa355	ceg1-ts	-0.049	0.053	0.2431	0
YBR160W_tsa150	cdc28-4	-0.048	0.259	0.4036	0
YLR378C_tsa213	sec61-2	-0.046	0.244	0.3823	0
YBR060C_tsa311	orc2-2	-0.046	0.203	0.3975	0
YNL061W_tsa630	nop2-9	-0.043	0.199	0.3943	0
YER148W_tsa476	spt15-p65s	-0.041	0.082	0.3502	0
YJL047C_dma2463	rtt101	-0.04	0.271	0.3991	0
YGL247W_tsa1123	brr6-ph	-0.038	0.534	0.423	0
YIL109C_tsa189	sec24-2	-0.038	0.297	0.4101	0
YJL072C_tsa1228	yjl072c-ph	-0.038	0.023	0.1309	0
YDR236C_tsa1245	ydr236c-ph	-0.037	0.362	0.4079	0
YGR172C_tsa981	yip1-40	-0.036	0.157	0.3924	0
YJL085W_tsa848	exo70-38	-0.036	0.115	0.402	0
YMR079W_tsa53	sec14-3	-0.035	0.251	0.4095	0
YGR135W_dma1892	pre9	-0.035	0.268	0.4085	0
YPR094W_tsa1049	rds3-1	-0.035	0.367	0.4174	0
YPR033C_tsa945	hts1-1	-0.034	0.132	0.3946	0
YDL045C_tsa1116	fad1-ph	-0.033	0.3	0.4415	0
YNL021W_dma3925	hda1	-0.033	0.268	0.4175	0
YDL195W_tsa852	sec31-1	-0.033	0.094	0.3771	0
YGR006W_tsa434	prp18-ts	-0.033	0.208	0.4241	0
YBR234C_tsa1070	arc40-ph	-0.032	0.084	0.3714	0
YML127W_tsa1160	rsc9-ph	-0.031	0.244	0.4244	0
YDR212W_tsa782	tcp1-1	-0.03	0.069	0.3722	0
YBR079C_tsa1060	rpg1-ph	-0.029	0.433	0.442	0
YDL064W_tsa370	ubc9-2	-0.029	0.629	0.4266	0
YJR076C_tsa356	cdc11-1	-0.029	0.185	0.4335	0
YFL034C-B_tsa610	mob2-22	-0.027	0.704	0.4436	0
YDR302W_tsa1177	gpi11-ph	-0.026	0.06	0.3798	0
YMR220W_tsa320	erg8-1	-0.026	0.514	0.4464	0
YOR326W_tsa337	myo2-16	-0.026	0.293	0.4409	0
YBL105C_tsa541	pkc1-3	-0.025	0.331	0.4487	0
YGR113W_tsa243	dam1-9	-0.025	0.342	0.4406	0
YNR026C_tsa60	sec12-4	-0.024	0.62	0.4484	0
YHR166C_tsa87	cdc23-4	-0.024	0.507	0.4476	0
YDR113C_tsa862	pds1-128	-0.024	0.094	0.4062	0
YFL039C_tsa140	act1-125	-0.023	0.261	0.449	0
YDR086C_tsa1112	sss1-ph	-0.023	0.121	0.4361	0
YIL046W_tsa947	met30-9	-0.02	0.229	0.4525	0
YDR013W_tsa583	psf1-1	-0.019	0.199	0.445	0
YDL077C_dma649	vam6	-0.019	0.216	0.4554	0
YLR397C_tsa266	afg2-18	-0.018	0.215	0.4538	0
YIL106W_tsa1258	yil106w-ph	-0.018	0.371	0.4569	0
YLR115W_tsa801	cft2-1	-0.018	0.083	0.4335	0
YJR007W_tsa1252	yjr007w-ph	-0.017	0.239	0.452	0
YDL108W_tsa109	kin28-ts	-0.017	0.132	0.4494	0
YBR160W_tsa62	cdc28-td	-0.017	0.194	0.4634	0
YML069W_tsa629	pob3-7	-0.016	0.328	0.4576	0
YML023C_tsa1007	nse5-ts4	-0.014	0.266	0.4628	0
YLR317W_tsa1151	ylr317w-ph	-0.012	0.149	0.4631	0
YPR179C_dma5157	hda3	-0.012	0.071	0.4488	0
YJR074W_dma2663	mog1	-0.011	0.314	0.4705	0
YBR211C_tsa716	ame1-4	-0.011	0.34	0.4711	0
YPR023C_dma5033	eaf3	-0.01	0.159	0.4714	0
YOL094C_tsa171	rfc4-20	-0.01	0.258	0.4787	0
YAL034W-A_tsa235	mtw1-ts	-0.008	0.123	0.4747	0
YOR057W_tsa830	sgt1-3	-0.008	0.325	0.4793	0
YHR012W_dma2078	vps29	-0.008	0.153	0.4729	0
YGL045W_dma1630	rim8	-0.007	0.126	0.4797	0
YLR440C_tsa725	sec39-1	-0.007	0.475	0.4838	0
YDR150W_dma946	num1	-0.006	0.098	0.4761	0
YDR243C_tsa574	prp28-101	-0.006	0.282	0.4905	0
YOR014W_dma4431	rts1	-0.004	0.176	0.4897	0
YBR254C_tsa1174	trs20-ph	-0.004	0.239	0.4908	0
YGL116W_tsa368	cdc20-3	-0.003	0.135	0.49	0
YAL003W_tsa987	efb1-4	-0.001	0.487	0.4989	0
YDR182W_tsa413	cdc1-2	-0.001	0.225	0.4979	0
YDR141C_tsa854	dop1-1	0	0.31	0.4998	0
YPR133C_tsa1011	spn1-k192n	0	0.23	0.4992	0
YHR036W_tsa1041	brl1-c371r	0	0.521	0.4994	0
YLR105C_tsa676	sen2-1	0	0.379	0.4998	0
YMR043W_tsa1134	mcm1-ph	0	0.413	0.4999	0
YBR060C_tsa331	orc2-3	0	0.273	0.4996	0
YLR340W_tsa1152	rpp0-ph	0.001	0.04	0.4899	0
YFR036W_tsa88	cdc26-1	0.001	0.266	0.4964	0
YBR247C_tsa542	enp1-1	0.001	0.326	0.4972	0
YOR194C_tsa1185	toa1-ph	0.001	0.176	0.498	0
YDL126C_tsa179	cdc48-9	0.002	0.112	0.4912	0
YOR074C_tsa927	cdc21-1	0.002	0.091	0.4931	0
YPR161C_tsa1027	sgv1-23	0.003	0.165	0.4927	0
YLR022C_tsa1026	sdo1-vma1-ts	0.005	0.391	0.4875	0
YJR006W_tsa794	hys2-ts	0.005	0.139	0.4869	0
YBR167C_tsa1074	pop7-ph	0.005	0.452	0.4887	0
YDL058W_tsa441	uso1-1	0.007	0.322	0.4882	0
YFL034C-B_tsa814	mob2-36	0.008	0.038	0.4477	0
YDR126W_dma917	swf1	0.009	0.402	0.484	0
YHR107C_tsa30	cdc12-1	0.009	0.063	0.463	0
YOR048C_tsa914	rat1-1	0.01	0.115	0.4687	0
YBL035C_tsa365	pol12-ts	0.011	0.2	0.4743	0
YGR172C_tsa1125	yip1-ph	0.011	0.331	0.4794	0
YPL063W_tsa1189	tim50-ph	0.012	0.325	0.4731	0
YDR373W_tsa399	frq1-1	0.012	0.328	0.4686	0
YGR092W_tsa160	dbf2-3	0.012	0.509	0.4737	0
YBL105C_tsa539	pkc1-4	0.012	0.279	0.4694	0
YGL115W_dma1678	snf4	0.013	0.47	0.4681	0
YGR274C_tsa524	taf1-1	0.013	0.098	0.4495	0
YLR116W_tsa1144	msl5-ph	0.013	0.296	0.4737	0
YLR115W_tsa1143	cft2-ph	0.013	0.059	0.4354	0
YDR228C_tsa686	pcf11-ts2	0.014	0.273	0.4696	0
YFR032C-A_dma1563	rpl29	0.014	0.117	0.4564	0
YDL102W_tsa135	cdc2-2	0.015	0.179	0.4581	0
YLR305C_tsa123	stt4-4	0.015	0.092	0.4443	0
YDL098C_tsa1079	snu23-ph	0.016	0.088	0.4363	0
YBR196C_tsa91	pgi1-2	0.017	0.237	0.458	0
YDL111C_tsa1091	rrp42-ph	0.019	0.112	0.4294	0
YMR075W_dma3677	rco1	0.019	0.096	0.4363	0
YMR229C_tsa1051	rrp5-delta6	0.019	0.12	0.4411	0
YOL069W_tsa1154	nuf2-ph	0.02	0.326	0.4647	0
YBR160W_tsa174	cdc28-1	0.02	0.248	0.4603	0
YAL041W_tsa149	cdc24-4	0.022	0.384	0.4624	0
YOL081W_dma4362	ira2	0.024	0.243	0.4517	0
YGR075C_tsa480	prp38-1	0.025	0.535	0.4578	0
YOR294W_tsa687	rrs1-124	0.026	0.328	0.4352	0
YOR122C_tsa429	pfy1-14	0.027	0.402	0.4439	0
YIL150C_tsa110	mcm10-1	0.028	0.381	0.4325	0
YNR053C_tsa479	nog2-1	0.028	0.111	0.4142	0
YBL074C_tsa1108	aar2-ph	0.029	0.557	0.4643	0
YNR051C_dma4271	bre5	0.031	0.087	0.3675	0
YGL155W_tsa333	cdc43-2	0.031	0.269	0.4215	0
YAL038W_tsa34	cdc19-1	0.032	0.288	0.4235	0
YDR325W_tsa578	ycg1-2	0.033	0.072	0.3641	0
YLR410W_dma3437	vip1	0.035	0.426	0.4382	0
YGR047C_tsa1240	ygr047c-ph	0.037	0.406	0.4149	0
YJR064W_tsa1254	yjr064w-ph	0.037	0.171	0.3907	0
YML114C_tsa695	taf8-7	0.039	0.196	0.4087	0
YMR123W_dma3715	pkr1	0.04	0.08	0.3433	0
YLR218C_dma3287	coa4	0.04	0.05	0.299	0
YMR235C_tsa118	rna1-1	0.041	0.453	0.4225	0
YOR204W_tsa561	ded1-95	0.041	0.314	0.4222	0
YLR196W_tsa1142	pwp1-ph	0.042	0.114	0.3486	0
YCL059C_tsa326	krr1-18	0.043	0.126	0.3676	0
YDR145W_tsa515	taf12-w486stop	0.043	0.254	0.3898	0
YHR191C_dma2228	ctf8	0.044	0.237	0.3759	0
YDR016C_tsa1077	dad1-ph	0.044	0.078	0.3321	0
YNR035C_tsa471	arc35-6	0.045	0.558	0.4525	0
YML128C_dma3618	msc1	0.045	0.303	0.4108	0
YBR160W_tsa175	cdc28-13	0.046	0.349	0.3909	0
YFL034C-B_tsa612	mob2-40	0.046	0.695	0.4296	0
YBL097W_tsa511	brn1-16	0.046	0.14	0.38	0
YLR316C_tsa1150	tad3-ph	0.047	0.141	0.3858	0
YPR086W_tsa1274	ypr086w-ph	0.049	0.415	0.3801	0
YGR245C_tsa523	sda1-2	0.049	0.554	0.417	0
YOR075W_tsa212	ufe1-1	0.05	0.284	0.4018	0
YAL041W_tsa408	cdc24-1	0.051	0.172	0.369	0
YOL144W_tsa1025	nop8-101	0.052	0.459	0.3834	0
YJL104W_tsa499	pam16-3	0.053	0.167	0.3523	0
YOR004W_tsa1057	utp23-ph	0.053	0.176	0.3621	0
YDR064W_tsa1111	rps13-ph	0.053	0.42	0.3767	0
YJR042W_tsa1266	yjr042w-ph	0.054	0.108	0.3297	0
YDR021W_tsa728	fal1-1	0.055	0.46	0.3765	0
YAL001C_tsa508	tfc3-g349e	0.055	0.308	0.3981	0
YFL034C-B_tsa813	mob2-24	0.056	0.467	0.3925	0
YOR070C_dma4499	gyp1	0.056	0.063	0.2588	0
YFL039C_tsa219	act1-122	0.057	0.156	0.3383	0
YOR184W_dma4596	ser1	0.057	0.235	0.3505	0
YJL002C_tsa735	ost1-6	0.057	0.278	0.3582	0
YMR033W_tsa495	arp9-1	0.057	0.484	0.384	0
YOR181W_tsa230	las17-14	0.057	0.053	0.2095	0
YPL266W_tsa984	dim1-2	0.057	0.435	0.4025	0
YIL048W_tsa188	neo1-2	0.058	0.216	0.3543	0
YDR473C_tsa58	prp3-1	0.058	0.069	0.2677	0
YDL190C_dma786	ufd2	0.059	0.015	0.003108	0
YGR103W_tsa447	nop7-1	0.06	0.205	0.3783	0
YDL193W_tsa1223	nus1-ph	0.06	0.295	0.3591	0
YPR088C_tsa1233	ypr088c-ph	0.06	0.093	0.2774	0
YLR319C_dma3370	bud6	0.06	0.143	0.3121	0
YHR036W_tsa1043	brl1-k405i	0.062	0.086	0.2796	0
YBR070C_tsa1061	alg14-ph	0.064	0.382	0.3593	0
YDR088C_tsa656	slu7-ts1	0.064	0.483	0.402	0
YBR135W_tsa923	cks1-35	0.066	0.486	0.3782	0
YPL085W_tsa119	sec16-2	0.066	0.341	0.3799	0
YDR303C_tsa503	rsc3-1	0.068	0.396	0.3467	0
YAL011W_dma17	swc3	0.068	0.179	0.3111	0
YOR168W_tsa1198	gln4-ph	0.07	0.503	0.3505	0
YDR082W_tsa599	stn1-13	0.07	0.218	0.3509	0
YJR112W_tsa439	nnf1-48	0.071	0.175	0.3025	0
YBR060C_tsa295	orc2-1	0.071	0.459	0.3802	0
YDL105W_tsa993	nse4-ts4	0.072	0.166	0.2948	0
YLR383W_tsa747	smc6-9	0.072	0.095	0.2726	0
YER093C_tsa811	tsc11-5	0.072	0.326	0.3658	0
YGR140W_tsa133	cbf2-1	0.074	0.311	0.3339	0
YJR043C_dma2634	pol32	0.076	0.582	0.3786	0
YER092W_dma1381	ies5	0.076	0.211	0.3209	0
YGL061C_tsa239	duo1-2	0.076	0.066	0.178	0
YLR298C_tsa632	yhc1-1	0.076	0.166	0.2914	0
YOR224C_tsa1195	rpb8-ph	0.077	0.232	0.3122	0
YCL061C_dma522	mrc1	0.077	0.273	0.3303	0
YDR189W_tsa251	sly1-ts	0.077	0.338	0.3269	0
YDR449C_tsa1255	ydr449c-ph	0.079	0.17	0.292	0
YBR109C_tsa155	cmd1-3	0.08	0.818	0.3803	0
YDR315C_dma1059	ipk1	0.081	0.299	0.3425	0
YHR107C_tsa50	cdc12-td	0.081	0.166	0.3121	0
YML046W_tsa494	prp39-1	0.082	0.477	0.3329	0
YLR440C_tsa726	sec39-2	0.082	0.302	0.3159	0
YFL039C_tsa904	act1-108	0.084	0.276	0.3336	0
YDL003W_tsa70	mcd1-73	0.086	0.068	0.1609	0
YDL207W_tsa920	gle1-4	0.086	0.183	0.3255	0
YGR140W_tsa76	cbf2-42	0.086	0.457	0.355	0
YMR227C_tsa638	taf7-ts1	0.087	0.198	0.3126	0
YCR077C_dma599	pat1	0.088	0.288	0.3199	0
YPR016C_tsa1272	ypr016c-ph	0.089	0.262	0.3162	0
YGR034W_dma1803	rpl26b	0.09	0.457	0.3658	0
YOR370C_tsa258	mrs6-2	0.09	0.133	0.2763	0
YLR229C_tsa26	cdc42-1	0.091	0.067	0.148	0
YLR293C_tsa256	gsp1-p162l	0.092	0.044	0.06483	0
YHR122W_tsa1208	yhr122w-ph	0.092	0.259	0.2961	0
YFL034C-B_tsa616	mob2-8	0.092	0.285	0.3272	0
YGL151W_dma1703	nut1	0.093	0.398	0.3044	0
YBL023C_tsa111	mcm2-1	0.093	0.268	0.2747	0
YOR262W_tsa1215	yor262w-ph	0.093	0.219	0.3113	0
YNL126W_tsa1187	spc98-ph	0.094	0.234	0.2649	0
YDR201W_tsa1122	spc19-ph	0.095	0.623	0.3384	0
YDR164C_tsa36	sec1-1	0.095	0.326	0.3067	0
YLR163C_tsa497	mas1-1	0.097	0.279	0.263	0
YDL140C_tsa804	rpo21-1	0.098	0.327	0.3003	0
YNL147W_dma5339	lsm7	0.099	0.047	0.06694	0
YHR172W_tsa1256	yhr172w-ph	0.1	0.278	0.3095	0
YHR036W_tsa1042	brl1-c371s	0.102	0.365	0.2634	0
YJR057W_tsa22	cdc8-2	0.102	0.166	0.2724	0
YPL204W_tsa1196	hrr25-ph	0.103	0.186	0.2293	0
YPR055W_tsa122	sec8-9	0.104	0.278	0.277	0
YDL192W_dma784	arf1	0.105	0.288	0.2881	0
YPR178W_tsa819	prp4-ts	0.105	0.43	0.3305	0
YDR166C_tsa51	sec5-24	0.106	0.22	0.3077	0
YJL203W_tsa401	prp21-ts	0.107	0.375	0.2635	0
YLR191W_dma3258	pex13	0.107	0.513	0.2888	0
YGL163C_dma1715	rad54	0.107	0.26	0.2848	0
YJR076C_tsa126	cdc11-4	0.108	0.285	0.3032	0
YFR028C_tsa416	cdc14-2	0.11	0.297	0.3065	0
YOR272W_tsa734	ytm1-1	0.111	0.066	0.105	0
YDR062W_tsa586	lcb2-1	0.112	0.081	0.1334	0
YOR143C_tsa1173	thi80-ph	0.112	0.062	0.09458	0
YER157W_tsa47	cog3-2	0.113	0.104	0.1588	0
YDR339C_tsa1188	fcf1-ph	0.113	0.085	0.1452	0
YNL071W_dma3994	lat1	0.113	0.204	0.288	0
YDR118W_tsa1088	apc4-ph	0.114	0.234	0.2232	0
YPR019W_tsa1203	mcm4-ph	0.115	0.378	0.3316	0
YGR013W_tsa1121	snu71-ph	0.117	0.442	0.2454	0
YDR378C_dma1114	lsm6	0.117	0.166	0.2266	0
YFL005W_tsa307	sec4-8	0.118	0.289	0.2374	0
YMR200W_tsa1103	rot1-ph	0.118	0.257	0.2308	0
YCR002C_tsa79	cdc10-2	0.118	0.282	0.2862	0
YBR153W_tsa1073	rib7-ph	0.119	0.16	0.1842	0
YJR076C_tsa83	cdc11-3	0.12	0.417	0.3044	0
YBR156C_tsa236	sli15-3	0.124	0.333	0.2838	0
YDR437W_tsa1012	gpi19-2xh	0.125	0.431	0.2563	0
YIL115C_tsa553	nup159-1	0.125	0.203	0.2259	0
YPL228W_tsa419	cet1-2	0.126	0.206	0.2453	0
YFL029C_tsa650	cak1-23	0.126	0.129	0.1938	0
YGL065C_tsa461	alg2-1	0.129	0.246	0.2267	0
YML126C_tsa1104	erg13-ph	0.129	0.085	0.1131	0
YMR213W_tsa702	cef1-13	0.13	0.4	0.2114	0
YML032C_dma3531	rad52	0.13	0.184	0.2114	0
YDR060W_tsa249	mak21-1	0.132	0.081	0.08234	0
YBR236C_tsa357	abd1-8	0.132	0.417	0.2942	0
YDL014W_tsa128	nop1-3	0.133	0.072	0.07415	0
YDR050C_tsa988	tpi1-1670	0.134	0.184	0.1846	0
YOR204W_tsa557	ded1-199	0.134	0.38	0.2119	0
YDL003W_tsa1229	ydl003w-ph	0.134	0.293	0.2553	0
YLR045C_tsa550	stu2-12	0.135	0.211	0.1699	0
YER147C_tsa1259	yer147c-ph	0.136	0.135	0.1425	0
YBR152W_tsa1075	spp381-ph	0.138	0.204	0.1636	0
YFL039C_tsa138	act1-4	0.138	0.365	0.208	0
YHR040W_tsa1067	bcd1-ph	0.139	0.309	0.2061	0
YDR158W_dma938	hom2	0.139	0.499	0.2416	0
YOR123C_dma4542	leo1	0.14	0.149	0.1367	0
YOL021C_tsa1030	dis3-1	0.14	0.107	0.1385	0
YPL252C_tsa428	yah1-ts	0.14	0.331	0.2709	0
YCR002C_tsa81	cdc10-4	0.141	0.148	0.1335	0
YLR033W_tsa1145	rsc58-ph	0.141	0.347	0.2062	0
YDR531W_tsa1225	cab1-ph	0.142	0.358	0.1877	0
YDL087C_tsa711	luc7-1	0.144	0.519	0.2009	0
YGL066W_dma1654	sgf73	0.144	0.254	0.1923	0
YER155C_dma1444	bem2	0.144	0.114	0.1385	0
YOR103C_tsa1158	ost2-ph	0.145	0.296	0.1717	0
YOR057W_tsa427	sgt1-5	0.145	0.184	0.2151	0
YLR119W_dma3215	srn2	0.145	0.672	0.247	0
YFL031W_dma1495	hac1	0.145	0.54	0.2622	0
YPL233W_tsa452	nsl1-6	0.146	0.427	0.2752	0
YDL105W_tsa992	nse4-ts3	0.147	0.214	0.1384	0
YOR322C_dma4720	ldb19	0.147	0.182	0.134	0
YPR183W_tsa330	dpm1-6	0.148	0.157	0.1471	0
YFL039C_tsa74	act1-120	0.148	0.067	0.05109	0
YFL039C_tsa72	act1-124	0.15	0.3	0.2399	0
YNL102W_tsa343	pol1-ts	0.151	0.215	0.1321	0
YMR296C_tsa603	lcb1-2	0.151	0.166	0.1833	0
YGL233W_tsa40	sec15-1	0.152	0.097	0.07507	0
YPL228W_tsa420	cet1-15	0.152	0.23	0.167	0
YDL213C_dma796	nop6	0.153	0.177	0.1497	0
YCR052W_tsa1191	rsc6-ph	0.155	0.155	0.132	0
YNL001W_dma4193	dom34	0.155	0.224	0.198	0
YLR367W_dma3402	rps22b	0.157	0.258	0.1397	0
YDR434W_tsa1178	gpi17-ph	0.158	0.248	0.1573	0
YBL076C_tsa275	ils1-1	0.158	0.292	0.1458	0
YER093C_tsa658	tsc11-1	0.158	0.273	0.2001	0
YDR156W_dma940	rpa14	0.159	0.252	0.1818	0
YFL039C_tsa142	act1-136	0.159	0.388	0.1866	0
YPR082C_tsa1237	ypr082c-ph	0.159	0.37	0.1801	0
YDR091C_tsa1127	rli1-ph	0.159	0.208	0.147	0
YIR005W_dma2423	ist3	0.159	0.2	0.132	0
YDR062W_tsa575	lcb2-2	0.16	0.268	0.2006	0
YLR457C_tsa222	nbp1-1	0.16	0.171	0.1316	0
YBR131W_dma294	ccz1	0.16	0.115	0.09985	0
YPL043W_tsa660	nop4-3	0.161	0.477	0.3536	0
YDL209C_tsa1052	cwc2-1	0.161	0.094	0.05895	0
YDR454C_tsa1183	guk1-ph	0.161	0.351	0.2362	0
YBL050W_tsa45	sec17-1	0.163	0.21	0.1299	0
YBR154C_tsa1110	rpb5-ph	0.163	0.371	0.242	0
YDR196C_tsa1204	cab5-ph	0.165	0.355	0.1889	0
YHR118C_tsa1136	orc6-ph	0.165	0.594	0.2426	0
YJR076C_tsa82	cdc11-2	0.166	0.187	0.1355	0
YIL118W_tsa654	rho3-1	0.166	0.388	0.1502	0
YPR018W_dma5036	rlf2	0.166	0.232	0.1332	0
YLR110C_dma3198	ccw12	0.167	0.116	0.07384	0
YLL004W_tsa351	orc3-70	0.168	0.39	0.1361	0
YIL022W_tsa956	tim44-8	0.169	0.179	0.1591	0
YPR162C_tsa1247	ypr162c-ph	0.169	0.382	0.2449	0
YPR168W_tsa818	nut2-ts	0.17	0.397	0.167	0
YNR035C_tsa470	arc35-5	0.17	0.101	0.08891	0
YDL043C_tsa369	prp11-ts	0.172	0.282	0.1264	0
YJL074C_tsa259	smc3-1	0.173	0.084	0.05726	0
YLR026C_tsa198	sed5-1	0.174	0.19	0.1699	0
YML121W_dma3622	gtr1	0.176	0.169	0.1033	0
YBR164C_dma318	arl1	0.176	0.312	0.1387	0
YFL034C-B_tsa940	mob2-20	0.176	1.252	0.2712	0
YGL043W_dma1631	dst1	0.177	0.277	0.1088	0
YBR058C-A_tsa571	tsc3-2	0.177	0.394	0.1486	0
YLR347C_tsa226	kap95-l63a	0.178	0.392	0.1582	0
YBR198C_tsa509	taf5-3	0.179	0.169	0.1002	0
YDR060W_tsa250	mak21-3	0.18	0.466	0.2478	0
YMR272C_dma3887	scs7	0.181	0.227	0.2058	0
YFL013C_dma5282	ies1	0.182	0.364	0.1692	0
YJR046W_tsa705	tah11-ts	0.187	0.195	0.1466	0
YGL022W_tsa790	stt3-1	0.187	0.176	0.1784	0
YML028W_dma3534	tsa1	0.188	0.227	0.121	0
YIL004C_tsa792	bet1-1	0.188	0.469	0.1862	0
YGR113W_tsa245	dam1-1	0.189	0.352	0.1397	0
YPR181C_tsa900	sec23-1	0.189	0.261	0.2379	0
YDR288W_tsa994	nse3-ts3	0.191	0.198	0.108	0
YBR102C_tsa24	exo84-102	0.193	0.4	0.1692	0
YJL034W_tsa210	kar2-159	0.194	0.563	0.1812	0
YFR037C_tsa999	rsc8-ts21	0.194	0.346	0.1765	0
YMR236W_tsa730	taf9-ts2	0.195	0.119	0.07769	0
YNR011C_tsa338	prp2-1	0.197	0.354	0.1785	0
YAR007C_tsa273	rfa1-m2	0.198	0.244	0.1072	0
YFR028C_tsa145	cdc14-1	0.199	0.121	0.07416	0
YDL015C_tsa1113	tsc13-ph	0.199	0.207	0.1459	0
YGR264C_tsa35	mes1-1	0.2	0.373	0.192	0
YKL203C_tsa838	tor2-29	0.203	0.34	0.2886	0
YFL034C-B_tsa788	mob2-38	0.203	0.7	0.227	0
YBR109C_tsa157	cmd1-8	0.205	0.299	0.1039	0
YDR280W_tsa1086	rrp45-ph	0.205	0.106	0.05412	0
YLR418C_dma3477	cdc73	0.207	0.141	0.06281	0
YBL105C_tsa537	pkc1-1	0.207	0.428	0.1299	0
YJL074C_tsa71	smc3-42	0.209	0.504	0.1429	0
YPL120W_dma4850	vps30	0.209	0.336	0.1989	0
YNR026C_tsa305	sec12-1	0.21	0.128	0.0668	0
YDL148C_tsa1234	ydl148c-ph	0.211	0.275	0.104	0
YNL061W_tsa624	nop2-3	0.211	0.338	0.117	0
YER125W_tsa182	rsp5-1	0.211	0.136	0.0613	0
YLR089C_dma3191	alt1	0.213	0.13	0.06675	0
YMR268C_tsa402	prp24-ts	0.214	0.166	0.08555	0
YIL104C_tsa1100	shq1-ph	0.22	0.19	0.06465	0
YLR274W_tsa403	cdc46-1	0.221	0.233	0.07985	0
YGR218W_tsa460	crm1-1	0.221	0.212	0.111	0
YML103C_dma3612	nup188	0.223	0.348	0.1612	0
YFL034C-B_tsa939	mob2-19	0.223	0.949	0.2178	0
YJR065C_tsa341	arp3-d11a	0.224	0.129	0.06926	0
YOR122C_tsa233	pfy1-13	0.225	0.194	0.07007	0
YOR341W_tsa530	rpa190-1	0.226	0.269	0.1073	0
YDR002W_tsa582	yrb1-51	0.232	0.308	0.07577	0
YOR254C_tsa231	sec63-1	0.233	0.348	0.125	0
YJL136C_dma2527	rps21b	0.235	0.172	0.08113	0
YJL097W_tsa896	phs1-1	0.236	0.381	0.1227	0
YBL041W_tsa1064	pre7-ph	0.236	0.529	0.1144	0
YFL039C_tsa909	act1-105	0.236	0.15	0.07518	0
YNR043W_tsa828	mvd1-1296	0.238	0.233	0.07202	0
YLR045C_tsa545	stu2-11	0.238	0.35	0.05577	0
YNL038W_tsa1157	gpi15-ph	0.238	0.347	0.09262	0
YLL011W_tsa1101	sof1-ph	0.238	0.467	0.1681	0
YGR091W_tsa472	prp31-1	0.239	0.23	0.05325	0
YML130C_tsa203	ero1-1	0.239	0.317	0.1165	0
YGR277C_tsa1205	cab4-ph	0.241	0.275	0.1219	0
YJL097W_tsa1207	phs1-ph	0.241	0.162	0.08129	0
YPL235W_tsa1202	rvb2-ph	0.242	0.252	0.05483	0
YLR127C_tsa262	apc2-8	0.245	0.406	0.159	0
YOR074C_tsa147	cdc21-ts	0.246	0.279	0.06358	0
YFL034C-B_tsa936	mob2-28	0.25	0.965	0.127	0
YMR100W_dma3688	mub1	0.253	0.413	0.1281	0
YOR085W_dma4524	ost3	0.256	0.294	0.07545	0
YMR028W_tsa697	tap42-11	0.256	0.369	0.06138	0
YDL030W_tsa361	prp9-ts	0.256	0.183	0.1023	0
YMR013C_tsa422	sec59-ts	0.271	0.377	0.1078	0
YDR246W_tsa1220	trs23-ph	0.272	0.255	0.06	0
YLR459W_tsa202	gab1-3	0.275	0.256	0.05503	0
YCL059C_tsa325	krr1-17	0.277	0.235	0.08163	0
YBR060C_tsa309	orc2-4	0.278	0.356	0.1156	0
YDL145C_tsa704	cop1-1	0.279	0.274	0.09707	0
YOR232W_tsa505	mge1-100	0.287	0.266	0.08269	0
YHR129C_dma2165	arp1	0.293	0.385	0.05318	0
YJL194W_tsa32	cdc6-1	0.294	0.513	0.1301	0
YDR208W_tsa129	mss4-103	0.3	0.347	0.06353	0
YJL174W_tsa1267	yjl174w-ph	0.307	0.421	0.09498	0
YFR051C_tsa823	ret2-1	0.312	0.41	0.1299	0
YMR307W_dma3905	gas1	0.314	0.265	0.05058	0
YLR060W_tsa1227	ylr060w-ph	0.32	0.354	0.1187	0
YGL055W_tsa506	ole1-m2	0.328	0.293	0.1275	0
YDR182W_tsa414	cdc1-6	0.332	0.325	0.05394	0
YGR278W_tsa1092	cwc22-ph	0.336	0.313	0.0704	0
YDR081C_tsa1239	ydr081c-ph	0.337	0.362	0.08126	0
YAL002W_dma23	vps8	0.34	0.437	0.07085	0
YJR057W_tsa407	cdc8-1	0.348	0.583	0.08898	0
YLR088W_tsa207	gaa1-ts	0.35	0.538	0.05159	0
YFR005C_tsa700	sad1-1	0.351	0.379	0.05624	0
YDR182W_tsa807	cdc1-4	0.358	0.229	0.0547	0
YIL144W_tsa246	tid3-1	0.378	0.274	0.05012	0
